# Supplementary material
Source: publisher figshare collection journal article supplement (https://karger.figshare.com/articles/dataset/_/5121148)
Supplement: Supplementary file 1 [file 1]

**Table S1. Primer sequences for genotyping using the SNaPshot primer extension method**

| rs<br>nu<br>mb<br>er | Strand  |                                                          | Primer sequences                                                           | T  |
|----------------------|---------|----------------------------------------------------------|----------------------------------------------------------------------------|----|
| rs2248690            | Forward | Forward Primer<br>Reverse Primer<br>Genotyping<br>Primer | GGGGTATTTGTGTCGTAG<br>GGGTCTGTGAGAGGGAAG<br>GACTCGAACCCAGAGCTGTGTCAA<br>A  | 65 |
| rs2077119            | Forward | Forward Primer<br>Reverse Primer<br>Genotyping<br>Primer | GGGGTATTTGTGTCCGTAG<br>GGGTCTGTGAGAGGGAAG<br>TTGGAAAGCTAACTCCCCCTAACAT     | 65 |
| rs4831               | Forward | Forward Primer<br>Reverse Primer<br>Genotyping<br>Primer | CCTCCATGGGTATACCTT<br>GGCCACACCTTTACTTCA<br>CCTGCTCCTTTGTCTTGCTCAGCT       | 60 |
| rs2593813            | Forward | Forward Primer<br>Reverse Primer<br>Genotyping<br>Primer | CACATCTGAGGGAAAAGGT<br>TGTCTTCGAAGCCTGAAA<br>ACACCTGGACATCATAAAATGCGG<br>A | 60 |
| rs4917               | Forward | Forward Primer<br>Reverse Primer<br>Genotyping<br>Primer | GGGGATCCATTTTGTGAA<br>GGGAAAGGCATAGCTAAAA<br>GGCAGAGGTTGCAGTGACCTGCA       | 55 |
| rs2518136            | Forward | Forward Primer<br>Reverse Primer<br>Genotyping<br>Primer | GGGGATCCATTTTGTGAA<br>GGGAAAGGCATAGCTAAAA<br>GTGATGACAGGACATTTGCTCTCC      | 55 |

Tm, melting temperature (°C)

**Table S2. Simple correlation between serum fetuin-A level and clinical or laboratory parameters**

| <b>Parameter</b>              |     | <b><i>r</i></b>  | <b><i>P</i></b> |
|-------------------------------|-----|------------------|-----------------|
| Dependent variable : Fetuin-A |     |                  |                 |
| SVCS                          |     | − 0.468          | < 0.001         |
| hfPWV                         |     | − 0.338          | < 0.001         |
| Age                           |     | − 0.327          | < 0.001         |
| Albumin                       |     | 0.284            | 0.001           |
|                               |     | <b>Mean ± SD</b> | <b><i>P</i></b> |
| Diabetes                      | Yes | 0.32 ± 0.08      | 0.002           |
|                               | No  | 0.35 ± 0.07      |                 |
| ASVD history                  | Yes | 0.30 ± 0.08      | 0.007           |
|                               | No  | 0.35 ± 0.07      |                 |

SVCS; Simple vascular calcification score, *r* : Pearson's correlation coefficient, hfPWV; heart-to-femoral pulse wave velocity, SD; standard deviation, ASVD; Atherosclerotic vascular disease

**Table S3. Simple correlation between SVCS and clinical or laboratory parameters**

| <b>Parameter</b>          | <b><i>r</i></b> | <b><i>P</i></b> |
|---------------------------|-----------------|-----------------|
| Dependent variable : SVCS |                 |                 |
| hfPWV                     | 0.280           | 0.025           |
| hsCRP                     | 0.274           | 0.026           |
| Fetuin-A                  | − 0.468         | < 0.001         |
| Albumin                   | − 0.345         | 0.005           |

SVCS; Simple vascular calcification score, *r* : Pearson's correlation coefficient, hfPWV; heart-to-femoral pulse wave velocity, hsCRP; high sensitivity C-reactive protein

**Table S4. Simple correlation between abdominal aortic calcification scores and SVCS**

|             |                       | <b>AAC (24)</b> | <b>AAC (8)</b> | <b>AAC (4)</b> |
|-------------|-----------------------|-----------------|----------------|----------------|
| <b>SVCS</b> | Pearson's correlation | 0.498           | 0.491          | 0.420          |
|             | <i>P</i>              | < 0.001         | < 0.001        | < 0.001        |

SVCS; Simple vascular calcification score measured by plain radiograph of pelvis and both hands.

AAC; Abdominal aortic calcification score measured by lateral lumbar film.

The severity of the anterior and posterior aortic calcification were graded individually on a 0–3 scale for each lumbar segment and the results were summarized to develop four different composite scores: (1) affected segments score (range 0–4); (2) anterior and posterior affected score (range 0–8); and (3) anterior–posterior severity score (range 0–24).
